# Supplementary material for: Approaching Polymer Dynamics Combining Artificial Neural Networks and Elastically Collective Nonlinear Langevin Equation
Source: MDPI journal article supplement (doi:10.3390/polym14081573), 2022-04-12
Supplement: s1 [file s1]

# Supplementary Materials: Approaching Polymer Dynamics Combining Artificial Neural Networks and Elastically Collective Nonlinear Langevin Equation

Luis Alejandro Miccio, Claudia Borredon, Ulises Casado, Anh D. Phan and Gustavo Ariel Schwartz

## Section S1. Dataset

The list of polyacrylates used in this work, ordered by the value of the deviation in the predicted glass transition temperature, is shown in Table SI 1. The polymers in bold italics belong to the external control group.

**Table S1.** The list of polyacrylates used in this work.

| Name                                                                               | Experimental<br>T <sub>g</sub> [K] | Pre-<br>dicted<br>T <sub>g</sub> [K] | Relative<br>Deviation<br>[%] |
|------------------------------------------------------------------------------------|------------------------------------|--------------------------------------|------------------------------|
| Poly [11-(4-(4-dimethylaminophenyldiazenyl)phenoxy)undecyl methacrylate]           | 344                                | 261.6                                | 24.0                         |
| Poly [11-((4'-cyanobiphenyl-4-yl)oxy)-11-oxoundecyl methacrylate]                  | 318                                | 257.8                                | 18.9                         |
| Poly [11-(4-(4-dimethylaminophenyldiazenyl)phenoxy)undecyl acrylate]               | 321                                | 270.0                                | 15.9                         |
| Poly [2-(2-(2-((4'-methoxybiphenyl-4-yl)oxy)ethoxy)ethyl acrylate]                 | 344                                | 294.0                                | 14.5                         |
| Poly [2-((4'-methoxybiphenyl-4-yl)oxy)ethyl acrylate]                              | 353                                | 303.1                                | 14.1                         |
| Poly [11-((4'-cyanobiphenyl-4-yl)oxy)undecyl acrylate]                             | 303                                | 260.8                                | 13.9                         |
| Poly(2-cyanoheptyl acrylate)                                                       | 389                                | 339.1                                | 12.8                         |
| Poly(terbutyl acrylate)                                                            | 316                                | 282.3                                | 10.7                         |
| Poly [11-((4'-cyanobiphenyl-4-yl)oxy)undecyl methacrylate]                         | 313                                | 281.6                                | 10.0                         |
| Poly(N,N-dibutylacrylamide)                                                        | 333                                | 306.4                                | 8.0                          |
| <b>Poly(2,2,2-trifluoroethyl acrylate)</b>                                         | <b>263</b>                         | <b>242.4</b>                         | <b>7.8</b>                   |
| Poly(ethyl methacrylate)                                                           | 359                                | 330.9                                | 7.8                          |
| Poly(N-(1-methylbutyl)acrylamide)                                                  | 380                                | 359.0                                | 5.5                          |
| Poly(2-hydroxyethyl methacrylate)                                                  | 359                                | 339.7                                | 5.4                          |
| Poly(neopentyl acrylate)                                                           | 295                                | 280.6                                | 4.9                          |
| Poly(3,3-dimethyl-2-butylbutyl methacrylate)                                       | 381                                | 362.5                                | 4.9                          |
| Poly [2-(2-(2-(2-((4-cyanophenyldiazenyl)phenoxy)ethoxy)ethoxy)ethyl methacrylate] | 293                                | 279.3                                | 4.7                          |
| Poly [2-((4'-cyanobiphenyl-4-yl)oxy)ethyl acrylate]                                | 323                                | 308.3                                | 4.6                          |
| Poly(biphenyl-4-yl methylacrylate)                                                 | 413                                | 394.5                                | 4.5                          |
| Poly(4-cyano-3-thiabutyl acrylate)                                                 | 249                                | 239.3                                | 3.9                          |
| Poly(octyl acrylate)                                                               | 208                                | 200.6                                | 3.6                          |
| Poly(propyl acrylate)                                                              | 236                                | 228.0                                | 3.4                          |
| Poly(terbutyl methacrylate)                                                        | 391                                | 379.0                                | 3.1                          |
| Poly(hexyl acrylate)                                                               | 216                                | 209.5                                | 3.0                          |
| Poly(methyl fluoromethacrylate)                                                    | 357                                | 346.4                                | 3.0                          |
| Poly[ethyl 3-(acryloyloxy)benzoate]                                                | 297                                | 288.8                                | 2.8                          |
| Poly(4-methylphenyl methacrylate)                                                  | 403                                | 392.1                                | 2.7                          |
| Poly(heptyl acrylate)                                                              | 213                                | 208.1                                | 2.3                          |
| Poly(methyl chloroacrylate)                                                        | 419                                | 409.4                                | 2.3                          |

|                                                               |            |              |            |
|---------------------------------------------------------------|------------|--------------|------------|
| Poly(n-pentyl acrylate)                                       | 216        | 211.2        | 2.2        |
| Poly(1H,1H-pentafluoropropyl acrylate)                        | 247        | 242.2        | 1.9        |
| Poly(3-ethoxypropyl acrylate)                                 | 218        | 213.8        | 1.9        |
| <b>Poly(butyl methacrylate)</b>                               | <b>293</b> | <b>288.1</b> | <b>1.7</b> |
| Poly(2-methylphenyl methacrylate)                             | 382        | 376.8        | 1.4        |
| <b>Poly(isopropyl methacrylate)</b>                           | <b>359</b> | <b>354.1</b> | <b>1.4</b> |
| Poly[methyl 2-(acryloyloxy)benzoate]                          | 319        | 315.0        | 1.3        |
| Poly(1,3-dimethylbutyl acrylate)                              | 258        | 255.3        | 1.0        |
| Poly(N-terbutylacrylamide)                                    | 401        | 397.0        | 1.0        |
| <b>Poly(propyl methacrylate)</b>                              | <b>308</b> | <b>305.1</b> | <b>1.0</b> |
| Poly(phenyl acrylate)                                         | 323        | 320.8        | 0.7        |
| Poly(methyl methacrylate)                                     | 376        | 373.8        | 0.6        |
| Poly(1H,1H,9H-hexadecafluorononyl methacrylate)               | 258        | 256.6        | 0.6        |
| Poly(3-oxa-5-hydroxypentyl methacrylate)                      | 278        | 277.0        | 0.4        |
| Poly(2-ethoxyethyl acrylate)                                  | 223        | 222.2        | 0.3        |
| Poly(2-methylpentyl acrylate)                                 | 235        | 234.3        | 0.3        |
| Poly(N-butylacrylamide)                                       | 319        | 318.0        | 0.3        |
| Poly [3-(4-(4-nitrophenyldiazenyl)phenoxy)propyl acrylate]    | 319        | 318.0        | 0.3        |
| Poly(butyl chloroacrylate)                                    | 330        | 329.0        | 0.3        |
| Poly(2-terbutylaminoethyl methacrylate)                       | 306        | 305.1        | 0.3        |
| Poly(3-thiabutyl acrylate)                                    | 213        | 212.4        | 0.3        |
| Poly(2-chloroethyl methacrylate)                              | 365        | 364.0        | 0.3        |
| Poly(3-methoxybutyl acrylate)                                 | 217        | 216.5        | 0.2        |
| Poly(2-cyanoethyl methacrylate)                               | 364        | 363.2        | 0.2        |
| Poly(2-heptyl acrylate)                                       | 235        | 234.5        | 0.2        |
| Poly(2,3-dimethylphenyl methylacrylate)                       | 398        | 397.1        | 0.2        |
| Poly(2,3-dimethylphenyl 2-methylacrylate)                     | 398        | 397.1        | 0.2        |
| Poly[ethyl 4-(methacrylamido)benzoate]                        | 441        | 440.1        | 0.2        |
| Poly(4-methylphenyl acrylate)                                 | 316        | 315.3        | 0.2        |
| Poly(4-chlorophenyl acrylate)                                 | 330        | 329.3        | 0.2        |
| Poly [6-((4'-cyanobiphenyl-4-yl)oxy)hexyl acrylate]           | 315        | 314.4        | 0.2        |
| Poly [5-((4'-cyanobiphenyl-4-yl)oxy)pentyl methacrylate]      | 333        | 332.4        | 0.2        |
| Poly [4-(phenyldiazenyl)phenyl methacrylate]                  | 374        | 373.3        | 0.2        |
| Poly(methyl fluoroacrylate)                                   | 404        | 403.2        | 0.2        |
| Poly[methyl 4-(methacrylamido)benzoate]                       | 453        | 452.2        | 0.2        |
| Poly(5-thiahexyl acrylate)                                    | 203        | 202.6        | 0.2        |
| Poly [6-((4'-methoxybiphenyl-4-yl)oxy)hexyl acrylate]         | 338        | 337.4        | 0.2        |
| Poly(benzyl acrylate)                                         | 279        | 278.5        | 0.2        |
| Poly[methyl 3-(acryloyloxy)benzoate]                          | 311        | 310.5        | 0.2        |
| Poly [5-((4'-cyanobiphenyl-4-yl)oxy)pentyl acrylate]          | 313        | 312.5        | 0.2        |
| Poly(2-phenylethyl acrylate)                                  | 270        | 269.5        | 0.2        |
| Poly(propyl chloroacrylate)                                   | 344        | 343.4        | 0.2        |
| Poly [methyl 3-(methacryloyloxy)benzoate]                     | 345        | 344.5        | 0.2        |
| Poly(8-cyano-7-thiaoctyl acrylate)                            | 223        | 222.6        | 0.2        |
| Poly [4-(4-cyanophenyldiazenyl)phenyl methacrylate]           | 363        | 362.4        | 0.2        |
| Poly(6-cyano-4-thiahexyl acrylate)                            | 215        | 214.7        | 0.2        |
| Poly(4-methoxyphenyl acrylate)                                | 324        | 323.5        | 0.2        |
| Poly(cyanomethyl acrylate)                                    | 433        | 432.3        | 0.2        |
| Poly(4-terbutylphenyl methacrylate)                           | 371        | 370.5        | 0.1        |
| Poly(1H,1H-undecafluorohexyl acrylate)                        | 234        | 233.7        | 0.1        |
| Poly [8-(4-(4-cyanophenyldiazenyl)phenoxy)octyl methacrylate] | 308        | 307.6        | 0.1        |
| Poly(3-dimethylaminophenyl acrylate)                          | 320        | 319.5        | 0.1        |
| Poly(5-cyano-3-thiapentyl acrylate)                           | 214        | 213.7        | 0.1        |
| Poly(ethyl ethacrylate)                                       | 300        | 299.6        | 0.1        |
| Poly(2-cyanoisobutyl acrylate)                                | 324        | 323.6        | 0.1        |
| Poly(1H,1H-nonafluoropentyl acrylate)                         | 236        | 235.7        | 0.1        |

|                                                                       |     |       |     |
|-----------------------------------------------------------------------|-----|-------|-----|
| Poly(3-chlorophenyl acrylate)                                         | 312 | 311.6 | 0.1 |
| Poly(5-cyano-3-oxapentyl acrylate)                                    | 250 | 249.7 | 0.1 |
| Poly(4-methoxyphenyl methacrylate)                                    | 379 | 378.5 | 0.1 |
| Poly(3-oxa-butyl methacrylate)                                        | 289 | 288.6 | 0.1 |
| Poly(4-thiahexyl acrylate)                                            | 197 | 196.8 | 0.1 |
| Poly [2-(4-terbutylphenoxy)-2-oxoethyl methacrylate]                  | 368 | 367.6 | 0.1 |
| Poly(4-terbutylphenyl acrylate)                                       | 344 | 343.6 | 0.1 |
| Poly [4-(4-(4-nitrophenyldiazenyl)phenoxy)butyl acrylate]             | 310 | 309.7 | 0.1 |
| Poly(2-cyanoethyl acrylate)                                           | 277 | 276.7 | 0.1 |
| Poly(1H,1H-undecafluoro-4-oxaheptyl acrylate)                         | 205 | 204.8 | 0.1 |
| Poly [4-(3-methoxy-3-oxopropyl)phenyl methacrylate]                   | 341 | 340.7 | 0.1 |
| Poly(2,4-dichlorophenyl methacrylate)                                 | 391 | 390.6 | 0.1 |
| Poly(3,4-dimethylphenyl methylacrylate)                               | 384 | 383.6 | 0.1 |
| Poly(3,4-dimethylphenyl 2-methylacrylate)                             | 384 | 383.6 | 0.1 |
| Poly [6-((biphenyl-4-yl)oxy)hexyl acrylate]                           | 321 | 320.7 | 0.1 |
| Poly(5,5,5-trifluoro-3-oxapentyl acrylate)                            | 235 | 234.8 | 0.1 |
| Poly(4-cyanophenyl methacrylate)                                      | 428 | 427.6 | 0.1 |
| Poly(fluoromethyl acrylate)                                           | 288 | 287.7 | 0.1 |
| Poly(2-phenylethyl methacrylate)                                      | 299 | 298.7 | 0.1 |
| Poly [2-(4-(phenyldiazenyl)phenoxy)ethyl methacrylate]                | 378 | 377.7 | 0.1 |
| Poly(4-cyanophenyl acrylate)                                          | 363 | 362.7 | 0.1 |
| Poly(4-cyanobenzyl acrylate)                                          | 317 | 316.7 | 0.1 |
| Poly(3,5,5-trimethylhexyl methacrylate)                               | 274 | 273.8 | 0.1 |
| Poly(heptafluoro-2-propyl acrylate)                                   | 278 | 277.8 | 0.1 |
| Poly(2-cyanoisopropyl acrylate)                                       | 339 | 338.7 | 0.1 |
| Poly [6-(4-(4-methoxyphenyldiazenyl)phenoxy)hexyl acrylate]           | 319 | 318.8 | 0.1 |
| Poly[methyl 4-(acryloyloxy)benzoate]                                  | 340 | 339.8 | 0.1 |
| Poly(biphenyl-4-yl acrylate)                                          | 383 | 382.7 | 0.1 |
| Poly [6-(4-(4-cyanophenyldiazenyl)phenoxy)hexyl acrylate]             | 300 | 299.8 | 0.1 |
| Poly(3-thiapentyl acrylate)                                           | 202 | 201.9 | 0.1 |
| Poly(1H,1H,5H-octafluoropentyl methacrylate)                          | 309 | 308.8 | 0.1 |
| Poly(biphenyl-2-yl acrylate)                                          | 378 | 377.8 | 0.1 |
| Poly [6-(4-(4-nitrophenyldiazenyl)phenoxy)hexyl acrylate]             | 309 | 308.8 | 0.1 |
| Poly(2-terbutylphenyl acrylate)                                       | 345 | 344.8 | 0.1 |
| Poly(4-chlorophenyl methacrylate)                                     | 404 | 403.8 | 0.1 |
| Poly[butyl 4-(methacrylamido)benzoate]                                | 401 | 400.8 | 0.1 |
| Poly(1H,1H,3H-hexafluorobutyl acrylate)                               | 251 | 250.9 | 0.0 |
| Poly(2,2,3,3,5,5,5-heptafluoro-4-oxapentyl acrylate)                  | 218 | 217.9 | 0.0 |
| Poly [2-(4-(4-pentiloxypenyldiazenyl)-2-methylphenoxy)hexyl acrylate] | 294 | 293.9 | 0.0 |
| Poly(3,3-dimethylbutyl methacrylate)                                  | 318 | 317.9 | 0.0 |
| Poly[butyl 4-(acryloyloxy)benzoate]                                   | 286 | 285.9 | 0.0 |
| Poly [6-(4-(4-dimethylaminophenyl)diazenyl)phenoxy)hexyl acrylate]    | 327 | 326.9 | 0.0 |
| Poly [4-(2-methoxy-2-oxoethyl)phenyl methacrylate]                    | 354 | 353.9 | 0.0 |
| Poly[4-(cyanomethyl)phenyl methacrylate]                              | 401 | 400.9 | 0.0 |
| Poly[methyl 4-(methacryloyloxy)benzoate]                              | 379 | 378.9 | 0.0 |
| Poly(1H,1H,5H-octafluoropentyl acrylate)                              | 238 | 237.9 | 0.0 |
| Poly(dodecyl methacrylate)                                            | 208 | 207.9 | 0.0 |
| Poly(3-methylbutyl acrylate)                                          | 228 | 227.9 | 0.0 |
| Poly(2,4-dichlorophenyl acrylate)                                     | 333 | 332.9 | 0.0 |
| Poly(biphenyl-4-yl 2-methylacrylate)                                  | 413 | 412.9 | 0.0 |
| Poly [4-(4-(4-cyanophenyldiazenyl)phenoxy)butyl methacrylate]         | 353 | 352.9 | 0.0 |
| Poly(butyl cyanoacrylate)                                             | 358 | 358.0 | 0.0 |
| Poly [4-(4-dimethylaminophenyldiazenyl)phenyl acrylate]               | 392 | 392.0 | 0.0 |
| Poly(methyl atropate)                                                 | 391 | 391.0 | 0.0 |

|                                                                       |            |              |              |
|-----------------------------------------------------------------------|------------|--------------|--------------|
| Poly[ethyl 4-(acryloyloxy)benzoate]                                   | 310        | 310.0        | 0.0          |
| Poly [4-(4-dimethylaminophenyldiazenyl)phenyl methacrylate]           | 457        | 457.0        | 0.0          |
| Poly(4,4,5,5-tetrafluoro-3-oxapentyl acrylate)                        | 251        | 251.0        | 0.0          |
| Poly(2-methylbutyl acrylate)                                          | 241        | 241.0        | 0.0          |
| Poly(N-methyl-N-phenylacrylamide)                                     | 453        | 453.0        | 0.0          |
| Poly(2-octyl acrylate)                                                | 228        | 228.0        | 0.0          |
| Poly(1H,1H-heptafluorobutyl acrylate)                                 | 243        | 243.0        | 0.0          |
| Poly(2-cyanobutyl acrylate)                                           | 384        | 384.1        | 0.0          |
| Poly [6-(4-(4-dimethylaminophenyldiazenyl)phenoxy)hexyl methacrylate] | 359        | 359.1        | 0.0          |
| Poly [6-(4-(4-cyanophenyldiazenyl)phenoxy)hexyl methacrylate]         | 333        | 333.1        | 0.0          |
| Poly(5,5,6,6,7,7,7-heptafluoro-3-oxaheptyl acrylate)                  | 228        | 228.2        | -0.1         |
| Poly [6-(4-(4-methoxyphenyldiazenyl)phenoxy)hexyl methacrylate]       | 341        | 341.4        | -0.1         |
| Poly(acrylamide)                                                      | 438        | 438.5        | -0.1         |
| Poly(N,N-diisopropylacrylamide)                                       | 393        | 393.5        | -0.1         |
| Poly [6-(4-(4-butoxyphenyldiazenyl)phenoxy)hexyl methacrylate]        | 352        | 352.4        | -0.1         |
| Poly(2,4-dimethylphenyl methylacrylate)                               | 384        | 384.5        | -0.1         |
| Poly(butyl acrylate)                                                  | 219        | 220.4        | -0.7         |
| Poly(3-methoxyphenyl methacrylate)                                    | 343        | 346.1        | -0.9         |
| Poly(4-benzoylphenyl methacrylate)                                    | 391        | 394.5        | -0.9         |
| Poly(3-methylphenyl acrylate)                                         | 298        | 301.4        | -1.1         |
| Poly(ethyl fluoromethacrylate)                                        | 316        | 319.7        | -1.2         |
| Poly(2-methylphenyl acrylate)                                         | 325        | 329.1        | -1.2         |
| Poly(2-cyanoethyl acrylate)                                           | 358        | 362.7        | -1.3         |
| Poly(isobutyl acrylate)                                               | 249        | 252.4        | -1.3         |
| <b>Poly(pentyl methacrylate)</b>                                      | <b>270</b> | <b>274.3</b> | <b>-1.6</b>  |
| Poly(N-isopropylacrylamide)                                           | 358        | 365.4        | -2.1         |
| Poly(2-ethylbutyl acrylate)                                           | 223        | 227.6        | -2.1         |
| Poly(2-ethylhexyl methacrylate)                                       | 263        | 268.5        | -2.1         |
| Poly(2-chlorophenyl methacrylate)                                     | 384        | 392.1        | -2.1         |
| Poly [2-((4'-cyanobiphenyl-4-yl)oxy)ethyl methacrylate]               | 368        | 376.4        | -2.3         |
| <b>Poly(phenyl methacrylate)</b>                                      | <b>383</b> | <b>391.8</b> | <b>-2.3</b>  |
| Poly[ethyl 2-(acryloyloxy)benzoate]                                   | 303        | 312.2        | -3.0         |
| Poly(octyl methacrylate)                                              | 253        | 261.5        | -3.3         |
| Poly(methyl acrylate)                                                 | 281        | 290.7        | -3.5         |
| Poly(isobutyl methacrylate)                                           | 326        | 338.6        | -3.9         |
| Poly(dimethylaminoethyl methacrylate)                                 | 292        | 303.4        | -3.9         |
| Poly(4-cyanobutyl acrylate)                                           | 233        | 242.3        | -4.0         |
| Poly [2-(2-((4-cyanophenyldiazenyl)phenoxy)ethoxy)ethyl methacrylate] | 314        | 327.5        | -4.3         |
| <b>Poly(ethyl acrylate)</b>                                           | <b>249</b> | <b>262.1</b> | <b>-5.3</b>  |
| Poly(2-ethylbutyl methacrylate)                                       | 284        | 299.3        | -5.4         |
| Poly [11-(4'-cyanobiphenyl-4-yl)undecyl methacrylate]                 | 303        | 319.6        | -5.5         |
| <b>Poly(hexyl methacrylate)</b>                                       | <b>268</b> | <b>283.2</b> | <b>-5.7</b>  |
| Poly(3-methylphenyl methacrylate)                                     | 380        | 404.3        | -6.4         |
| Poly(2-chlorophenyl acrylate)                                         | 318        | 338.4        | -6.4         |
| Poly [methyl 2-(methacryloyloxy)benzoate]                             | 337        | 358.7        | -6.4         |
| Poly(2-methoxyethyl acrylate)                                         | 223        | 237.6        | -6.5         |
| <b>Poly(secbutyl methacrylate)</b>                                    | <b>333</b> | <b>355.6</b> | <b>-6.8</b>  |
| Poly(3-methoxypropyl acrylate)                                        | 198        | 215.6        | -8.9         |
| <b>Poly(benzyl methacrylate)</b>                                      | <b>327</b> | <b>361.9</b> | <b>-10.7</b> |
| Poly(N-octylacrylamide)                                               | 220        | 244.8        | -11.3        |
| Poly(neopentyl methacrylate)                                          | 312        | 347.7        | -11.4        |

|                                                                          |     |       |       |
|--------------------------------------------------------------------------|-----|-------|-------|
| Poly(secbutyl chloroacrylate)                                            | 347 | 389.2 | -12.2 |
| Poly(N,N-dimethylacrylamide)                                             | 362 | 409.7 | -13.2 |
| Poly [2-(2-(2-((4-cyanophenyldiazenyl)phenoxy)ethoxy)ethyl methacrylate] | 310 | 356.4 | -15.0 |

### Section S2. Experimental Dynamics

Table SI 2 shows, for the external control group, the parameters of the Vogel-Fulcher-Tammann (VFT) equation:

$$\tau(T) = \tau_0 \exp\left(\frac{DT_0}{T - T_0}\right) \quad (1)$$

that fits the corresponding experimental dynamics together with the references the data were taken from. The following expression relates fragility ( $m$ ) with parameter  $D$  in the VFT equation:

$$m = \frac{\partial \log(\tau(T))}{\partial (T_g/T)} \bigg|_{T=T_g} = \frac{DT_0 T_g}{(T_g - T_0)^2} \log(e) \quad (2)$$

**Table S2.** Parameters of the Vogel-Fulcher-Tammann (VFT) equation for the external control group.

| Name                                   | T <sub>g</sub><br>[K] | Fragility | D     | T <sub>0</sub><br>[K] | τ <sub>0</sub><br>[s] | Ref |
|----------------------------------------|-----------------------|-----------|-------|-----------------------|-----------------------|-----|
| Poly (2,2,2 - trifluoroethyl acrylate) | 269                   | 109       | 3.90  | 237.8                 | 1.2E-11               | 1   |
| Poly (phenyl methacrylate)             | 383                   | 56        | 17.06 | 266.7                 | 1E-15                 | 2   |
| Poly (benzyl methacrylate)             | 327                   | 94        | 8.64  | 267.9                 | 1E-15                 | 2   |
| Poly (isopropyl methacrylate)          | 359                   | 89        | 9.24  | 290.4                 | 1E-15                 | 2   |
| Poly (secbutyl methacrylate)           | 333                   | 130       | 5.89  | 289.5                 | 1E-15                 | 2   |
| Poly (propyl methacrylate)             | 324                   | 63        | 10.79 | 246.5                 | 1E-13                 | 3   |
| Poly (butyl methacrylate)              | 304                   | 67        | 9.96  | 235.9                 | 1E-13                 | 4   |
| Poly (hexyl methacrylate)              | 281                   | 45        | 17.27 | 187.3                 | 1E-13                 | 4   |
| Poly (pentyl methacrylate)             | 291                   | 49        | 15.24 | 201.9                 | 1E-13                 | 4   |
| Poly (ethyl acrylate)                  | 257                   | 92        | 6.73  | 215.1                 | 1E-13                 | 4   |

### Section S3. SMILES Codification

Figure SI 1 shows a schematic picture of the encoding process. Each molecular structure is converted into a SMILES string, which is transformed into a binary image by employing a dictionary of SMILES characters and one-hot encoding. The dimensions of the images are  $n_d$  columns (number of SMILES characters in the dictionary) and  $n_{pos_{max}}$  rows (number of positions in the longest string of the dataset). In addition,  $m_x$  stands for the number of polymers in the dataset.

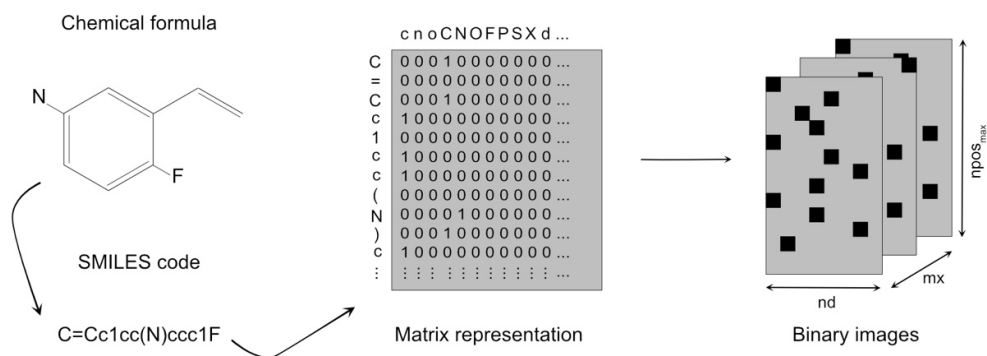

**Figure S1.** Schematic picture of the encoding process.

#### Section S4. ANN Architecture and Results

The neural network has been constructed using 6 convolutional and 2 fully connected layers, followed by an output linear regression layer. The number of filters and window sizes in the convolutional layers and the number of neurons in the fully connected layers are shown below.

**Table S3.** The number of filters and window sizes in the convolutional layers and the number of neurons in the fully connected layers.

| Layer           | Number of Filters/Neurons | Window Size |
|-----------------|---------------------------|-------------|
| Convolutional 1 | 16                        | (1,1)       |
| Convolutional 2 | 32                        | (2,2)       |
| Convolutional 3 | 64                        | (2,2)       |
| Convolutional 4 | 128                       | (2,2)       |
| Convolutional 5 | 256                       | (2,2)       |
| Convolutional 6 | 512                       | (2,2)       |
| Flatten         | -                         | -           |
| FC <sub>0</sub> | 30                        | -           |
| FC <sub>1</sub> | 20                        | -           |
| Output layer    | 1                         | -           |

Figure SI 2 shows the predicted vs experimental  $T_g$  values for the internal subset of polyacrylates after finishing the training process. Grey dots represent the training set and red dots the validation set. The mean absolute percentage error for the training set is 4.3% and for validation is 8.5%.

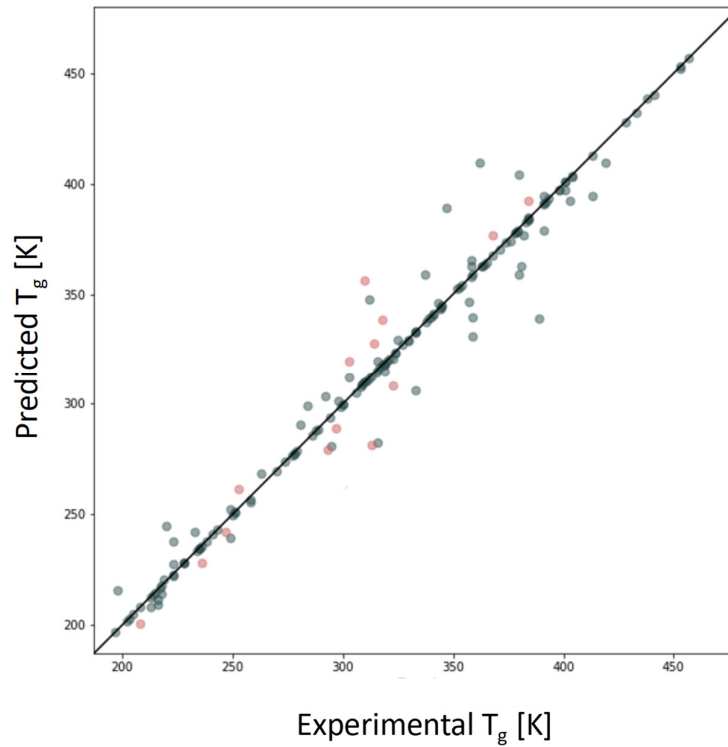

**Figure S2.** Shows the predicted vs experimental  $T_g$  values for the internal subset of polyacrylates after finishing the training process.

#### Section S5. Elastically Collective Nonlinear Langevin Equation (ECNLE)

As given in the main text, the temperature dependence of structural relaxation time is calculated using Kramer's theory

$$\frac{\tau}{\tau_s} = 1 + \frac{2\pi}{\sqrt{K_0 K_B}} \frac{k_B T}{d^2} \exp\left(\frac{F_B + F_e}{k_B T}\right) \quad (3)$$

where  $K_0, K_B, F_B/k_B T$  and  $F_e/k_B T$  are determined from the dynamic free energy  $F_{dyn}(r)$  and the radial distribution function,  $g(r)$ , and static structural factor,  $S(q)$ , of a hard-sphere fluid. The collective elastic energy contribution due to the long-range rearrangement of the molecules in the fluid, as a result of the escaping of a particle from its cage, is given by a sum over harmonic oscillator contributions whose shape is given by

$$F_e = 4\pi\rho \int_{r_{cage}}^{\infty} dr r^2 g(r) K_0 \frac{u^2(r)}{2} \quad (4)$$

where  $g(r)$  is the radial distribution function,  $K_0$  can be interpreted as a spring constant at the localization length, and  $u(r)$  is a displacement field originating from the surface of the particle cage. In addition, we calculate the harmonic curvature at the barrier position  $K_B$ . We define the local quantities such as the localization length or the minimum position of  $F_{dyn}(r)$ ,  $r_L$ , the barrier position or the local maximum position of  $F_{dyn}(r)$ ,  $r_B$ , and the curvatures  $K_0 = \left. \frac{\partial^2 F_{dyn}(r)}{\partial r^2} \right|_{r=r_L}$  and  $K_B = \left. \frac{\partial^2 F_{dyn}(r)}{\partial r^2} \right|_{r=r_B}$ . The short timescale  $\tau_s$  is  $g(d)^2 \tau_E$  with  $g(d)$  being the contact number of the fluid. The functions of  $g(r)$  and  $S(q)$  can be determined by molecular dynamics (MD) simulations or Percus-Yevick theory. In our work, we employ the Percus-Yevick theory with only one input parameter: the volume fraction  $\Phi$ .

All the above calculations give us the hard-sphere density dependence of alpha relaxation time. Quantitative comparisons between theoretical predictions and experiments require the thermal dependence of physical quantities. Thus, a thermal mapping constructed from the thermal expansion process is proposed, which is

$$T = T_g + (\Phi_g - \Phi)/\beta\Phi_0 \quad (5)$$

where  $\beta$  is the effective expansion coefficient,  $\Phi_0$  is the characteristic volume fraction, and  $\Phi_g$  is the volume fraction at the glass transition defined by  $\tau(\Phi_g) = 100$  s. Values of all parameters needed for ECNLE calculations are expressed in Table SI 4.

**Table S4.** ECNLE calculations.

| Parameters. | Values                                                         |
|-------------|----------------------------------------------------------------|
| $T_g$       | Given by experiments or simulation or ANN prediction in Kelvin |
| $\beta$     | $12 \times 10^{-4} K^{-1}$                                     |
| $\Phi_0$    | 0.5                                                            |
| $\tau_E$    | $10^{-13}$ s                                                   |
| $\Phi_g$    | 0.6157                                                         |

### Section S6. Deviations and Chemical Structure

Figure S3 shows the relative deviations (Experimental – Predicted)/Experimental (in %) histogram for the training and internal test sets (a). The chemical structures for those molecules with more significant relative deviations are shown in (b).

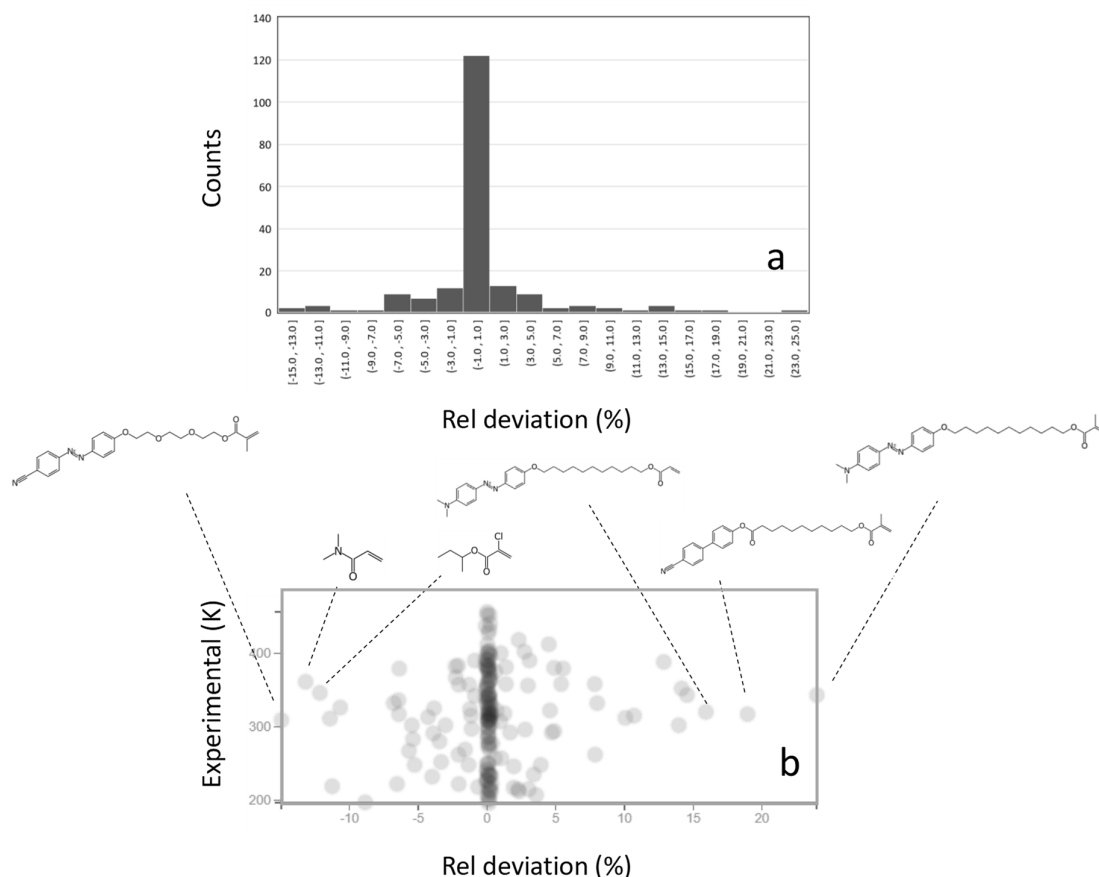

**Figure S3.** Relative deviations (Experimental – Predicted)/Experimental (in %) histogram for the training and internal test sets (a). The chemical structures for those molecules with more significant relative deviations are shown in (b).



### Section S7. Parameter 'a' of ECNLE Model.

Figure S4 shows the glass transition temperature dependence of the model adjustable parameter  $a$  for several polymers and glass formers. The solid line represents the linear fit of the experimental data. Data were taken from reference 5.

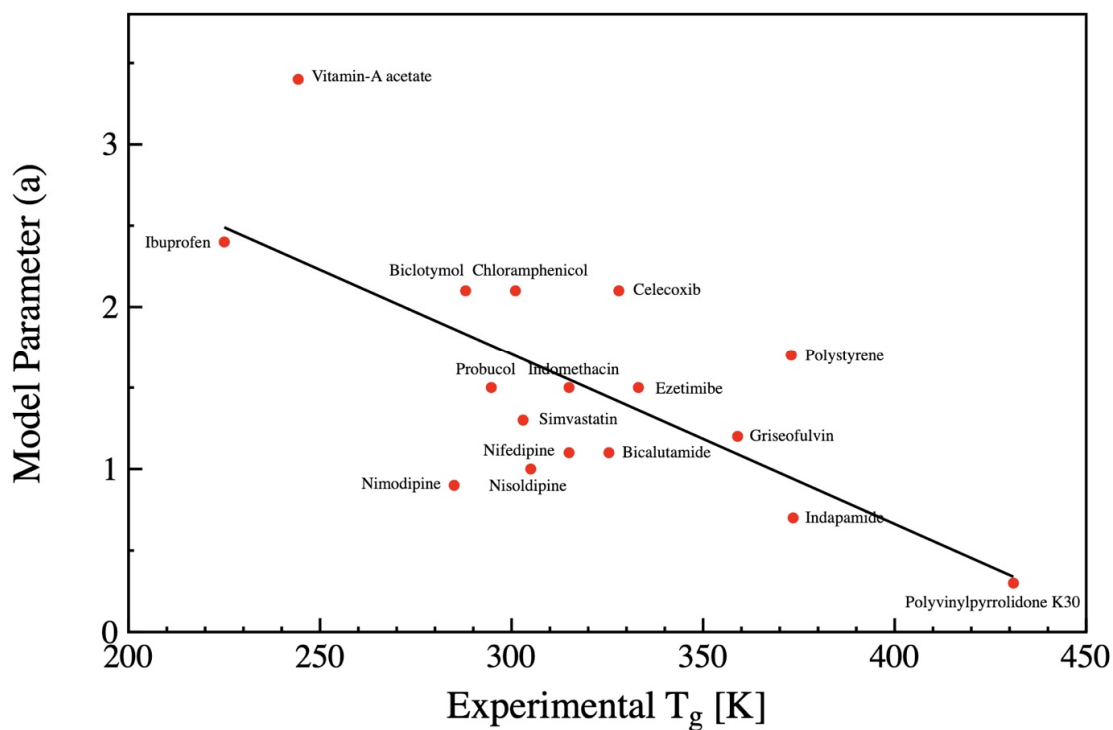

**Figure S4.** Glass transition temperature dependence of the model adjustable parameter  $a$  for several polymers and glass formers.
